# Supplementary material for: Sex hormone-binding globulin, androgens and mortality: the KORA-F4 cohort study
Source: PubMed Central journal article supplement — Endocr Connect. 2020 Mar 13;9(4):326–36. doi: 10.1530/EC-20-0080 (PMC7219137; doi:10.1530/ec-20-0080), 2020-03-13

**Supplementary Figure 3: Distribution of Total Testosterone Concentrations in nmol/l stratified for sex**

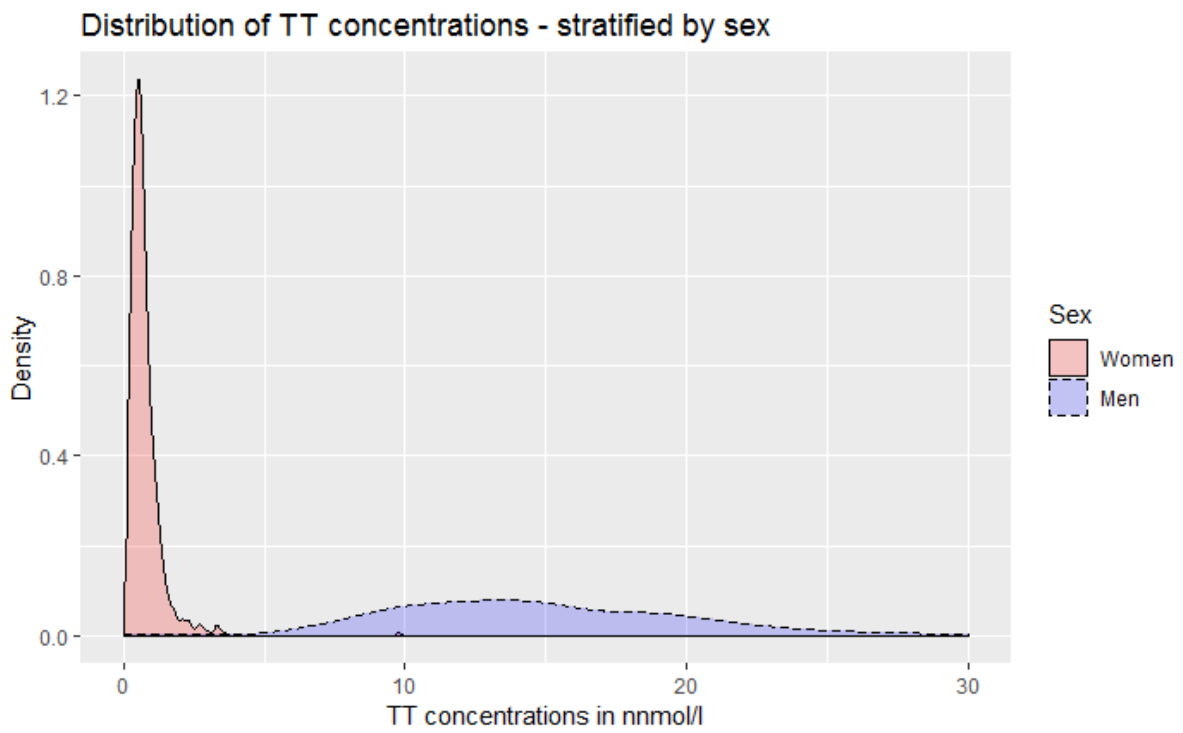

Supplement: supplementary_figure_3.pdf [file supplementary_figure_3.pdf]
