# Supplementary material for: Sex hormone-binding globulin, androgens and mortality: the KORA-F4 cohort study
Source: PubMed Central journal article supplement — Endocr Connect. 2020 Mar 13;9(4):326–36. doi: 10.1530/EC-20-0080 (PMC7219137; doi:10.1530/ec-20-0080), 2020-03-13
Supplement: supplementary_material_1.pdf [file supplementary_material_1.pdf]

## **Supplementary Text 1: Technical details of SHBG measurements**

Measuring range SHBG: 0-250 nmol/L (Mean: 43.81 nmol/L.)

Intra-assay coefficient of variation: 4.29 %

Inter-assay coefficient of variation range: 6.39-10.3%
