# Supplementary figures and images for: Sex hormone-binding globulin, androgens and mortality: the KORA-F4 cohort study
Source: PubMed Central journal article supplement — Endocr Connect. 2020 Mar 13;9(4):326–36. doi: 10.1530/EC-20-0080 (PMC7219137; doi:10.1530/ec-20-0080), 2020-03-13

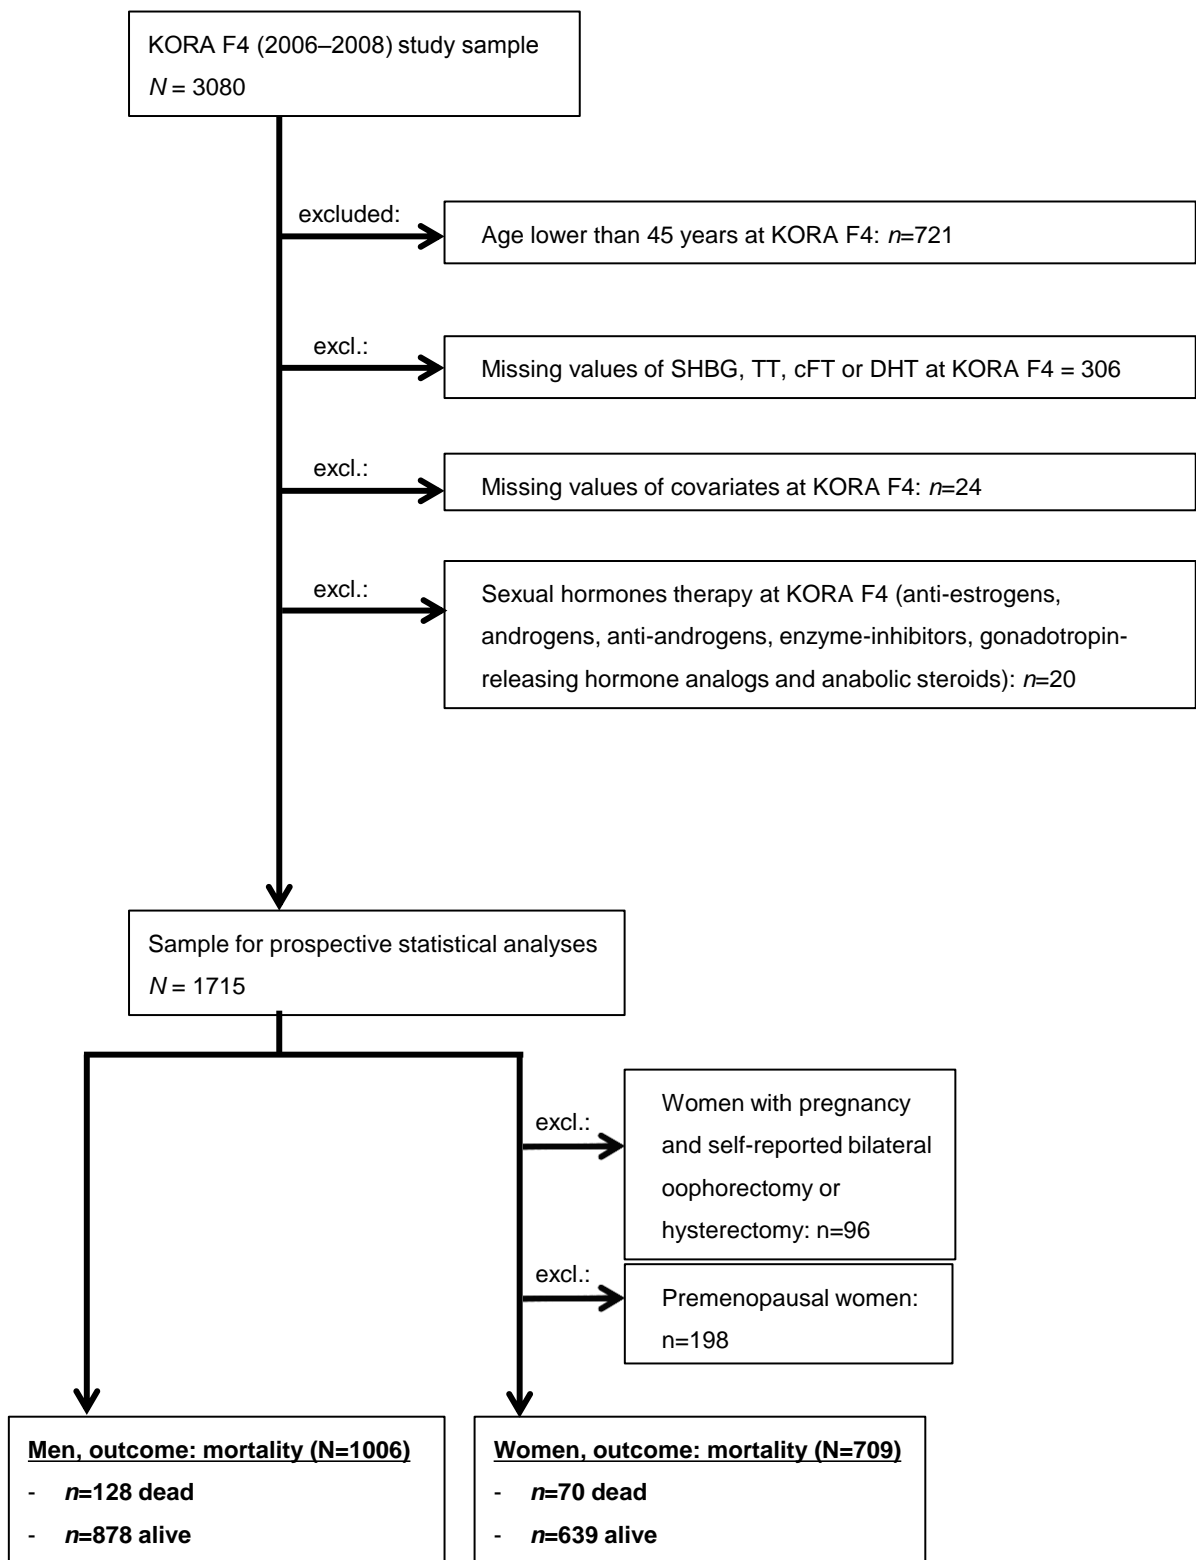

**Supplementary Figure 1: Exclusions for the statistical analysis**

Supplement: supplementary_figure_1.pdf [file supplementary_figure_1.pdf]

**Supplementary Figure 2: Distribution of SHBG Concentrations in nmol/l stratified for sex**

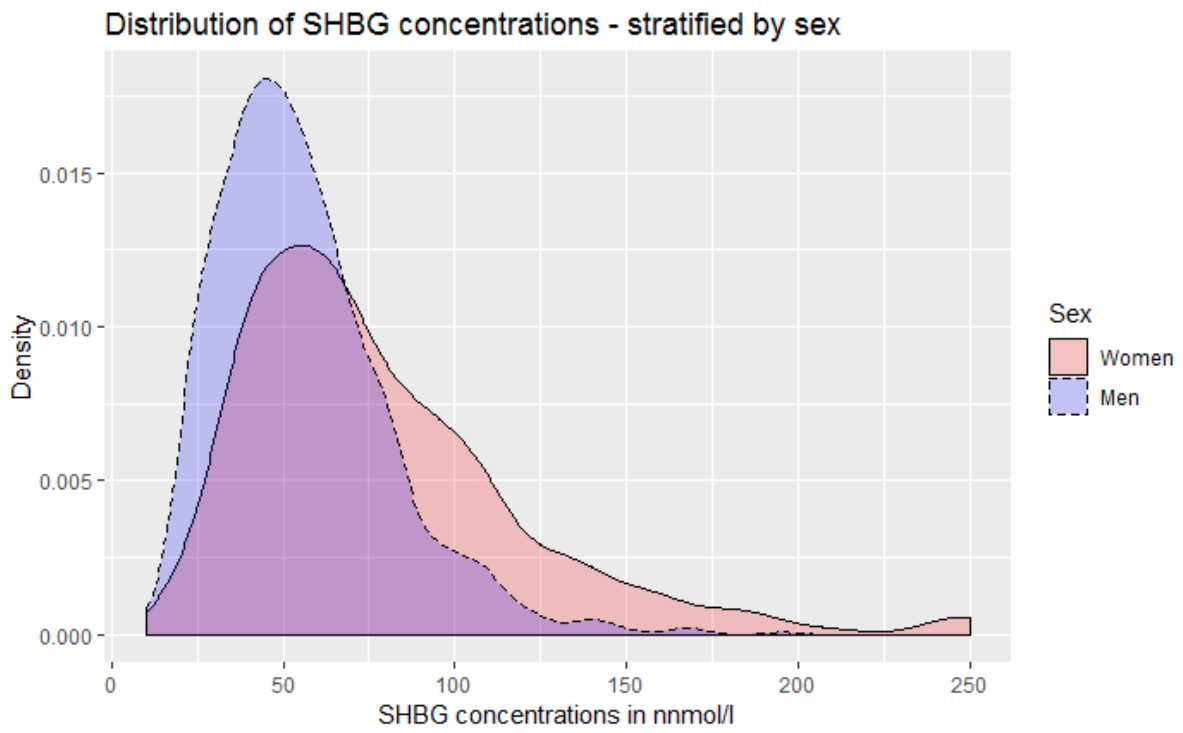

Supplement: supplementary_figure_2.pdf [file supplementary_figure_2.pdf]

**Supplementary Figure 5: Distribution of DHT Concentrations in nmol/l stratified for sex.**

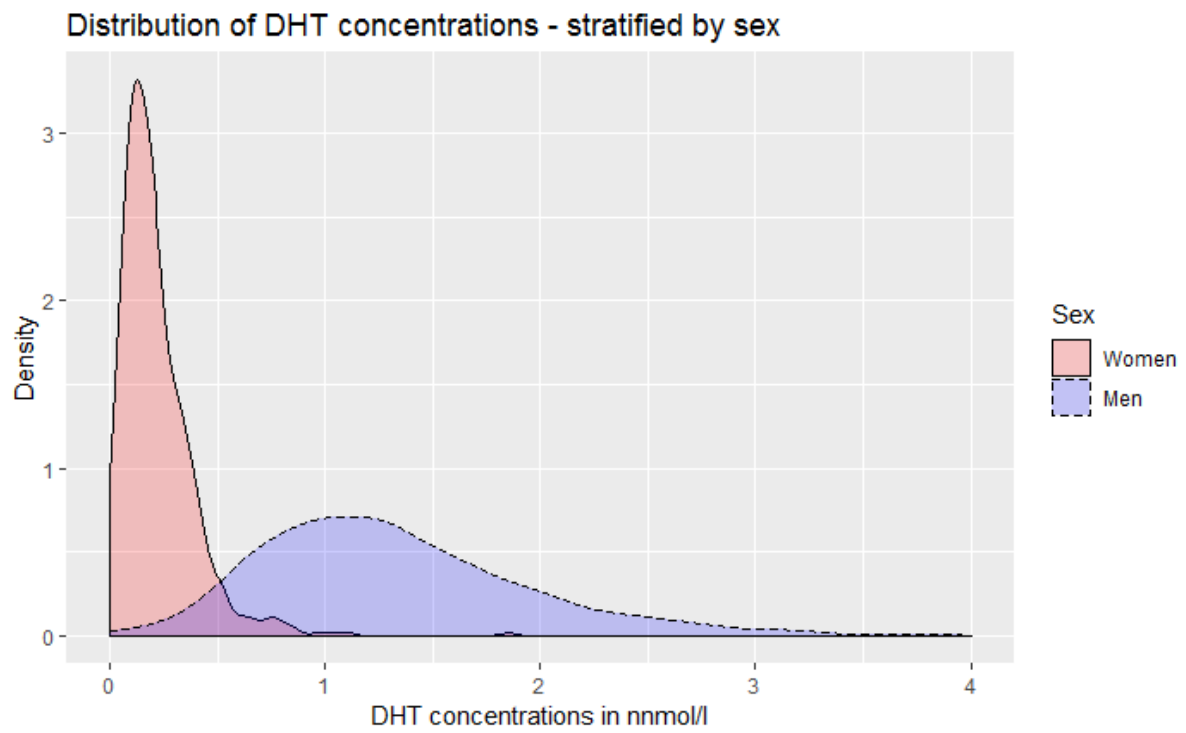

Supplement: supplementary_figure_5.pdf [file supplementary_figure_5.pdf]

**Supplementary Figure 6: Distribution of E2 Concentrations in nmol/l stratified for sex**

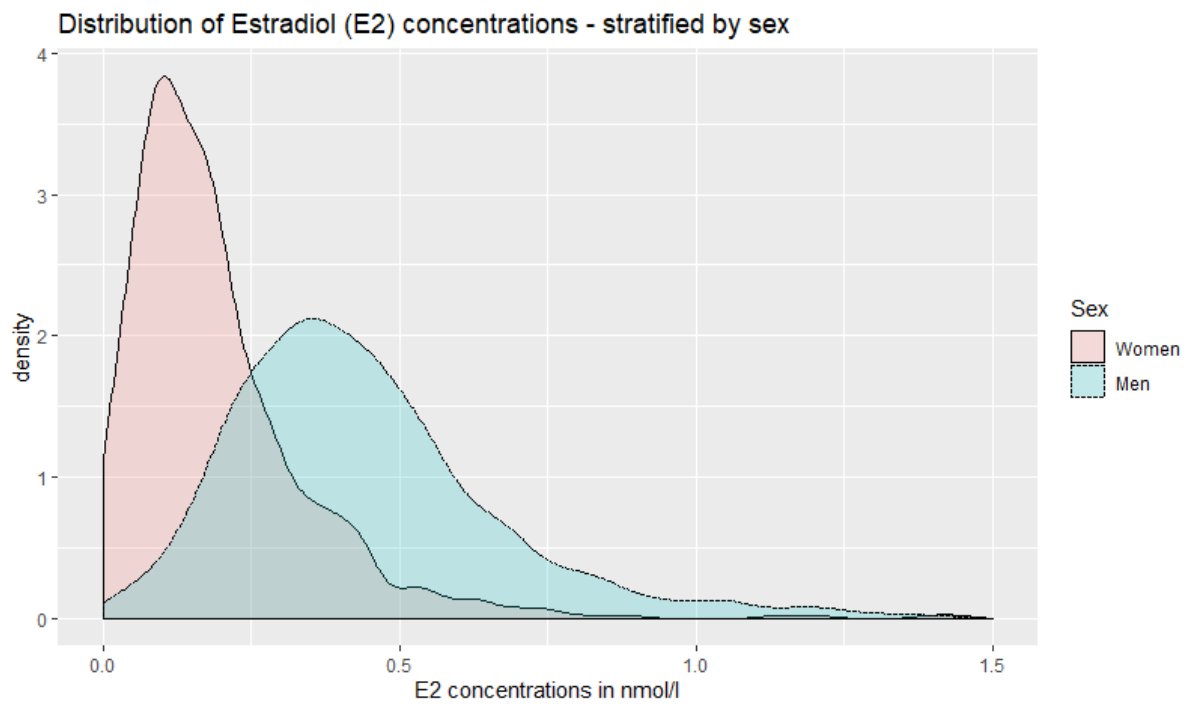

Supplement: supplementary_figure_6.pdf [file supplementary_figure_6.pdf]
